# Supplementary material
Source: PubMed Central journal article supplement (PMC9905256)
Supplement: NIHMS1834627-supplement-1.pdf [file NIHMS1834627-supplement-1.pdf]

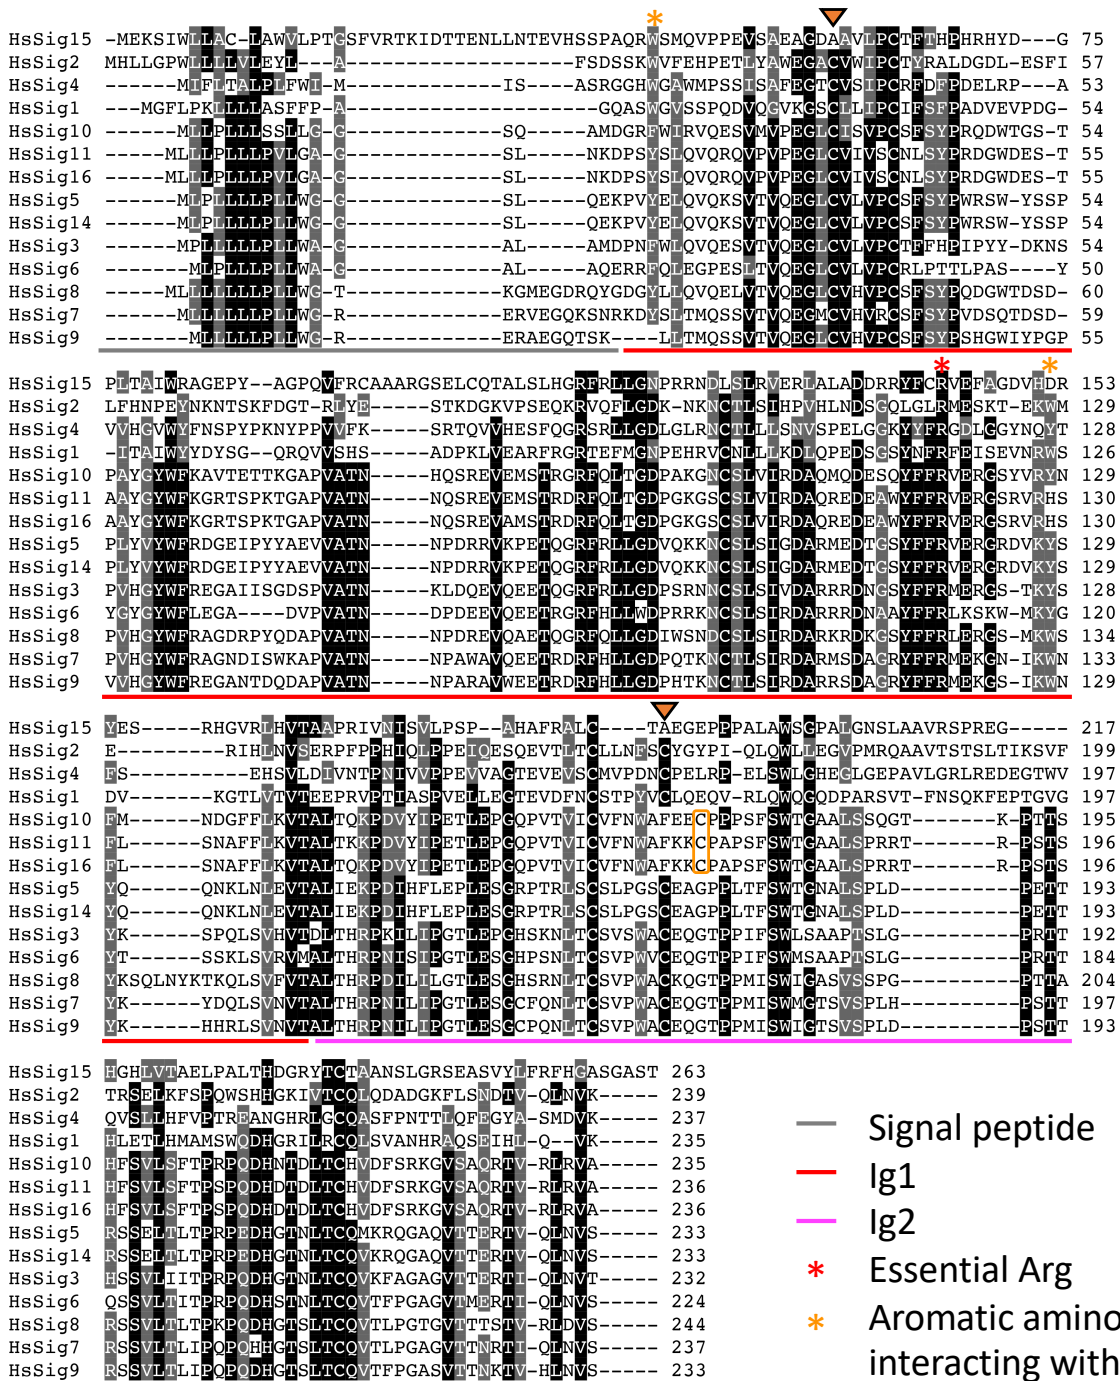

- Signal peptide
- Ig1
- Ig2
- \* Essential Arg
- \* Aromatic amino acid interacting with Sia
- ▽ Cys involved in inter-domain disulfide bond

### Supplementary Figure 1. Alignment of human Siglecs.

Amino acid sequences of the N-terminal part (signal peptide – Ig1 – Ig2) of human Siglecs were aligned with ClustalO, and conserved residues (>70% consensus) are highlighted. Black shade: same amino acid; Gray shade: similar amino acids.

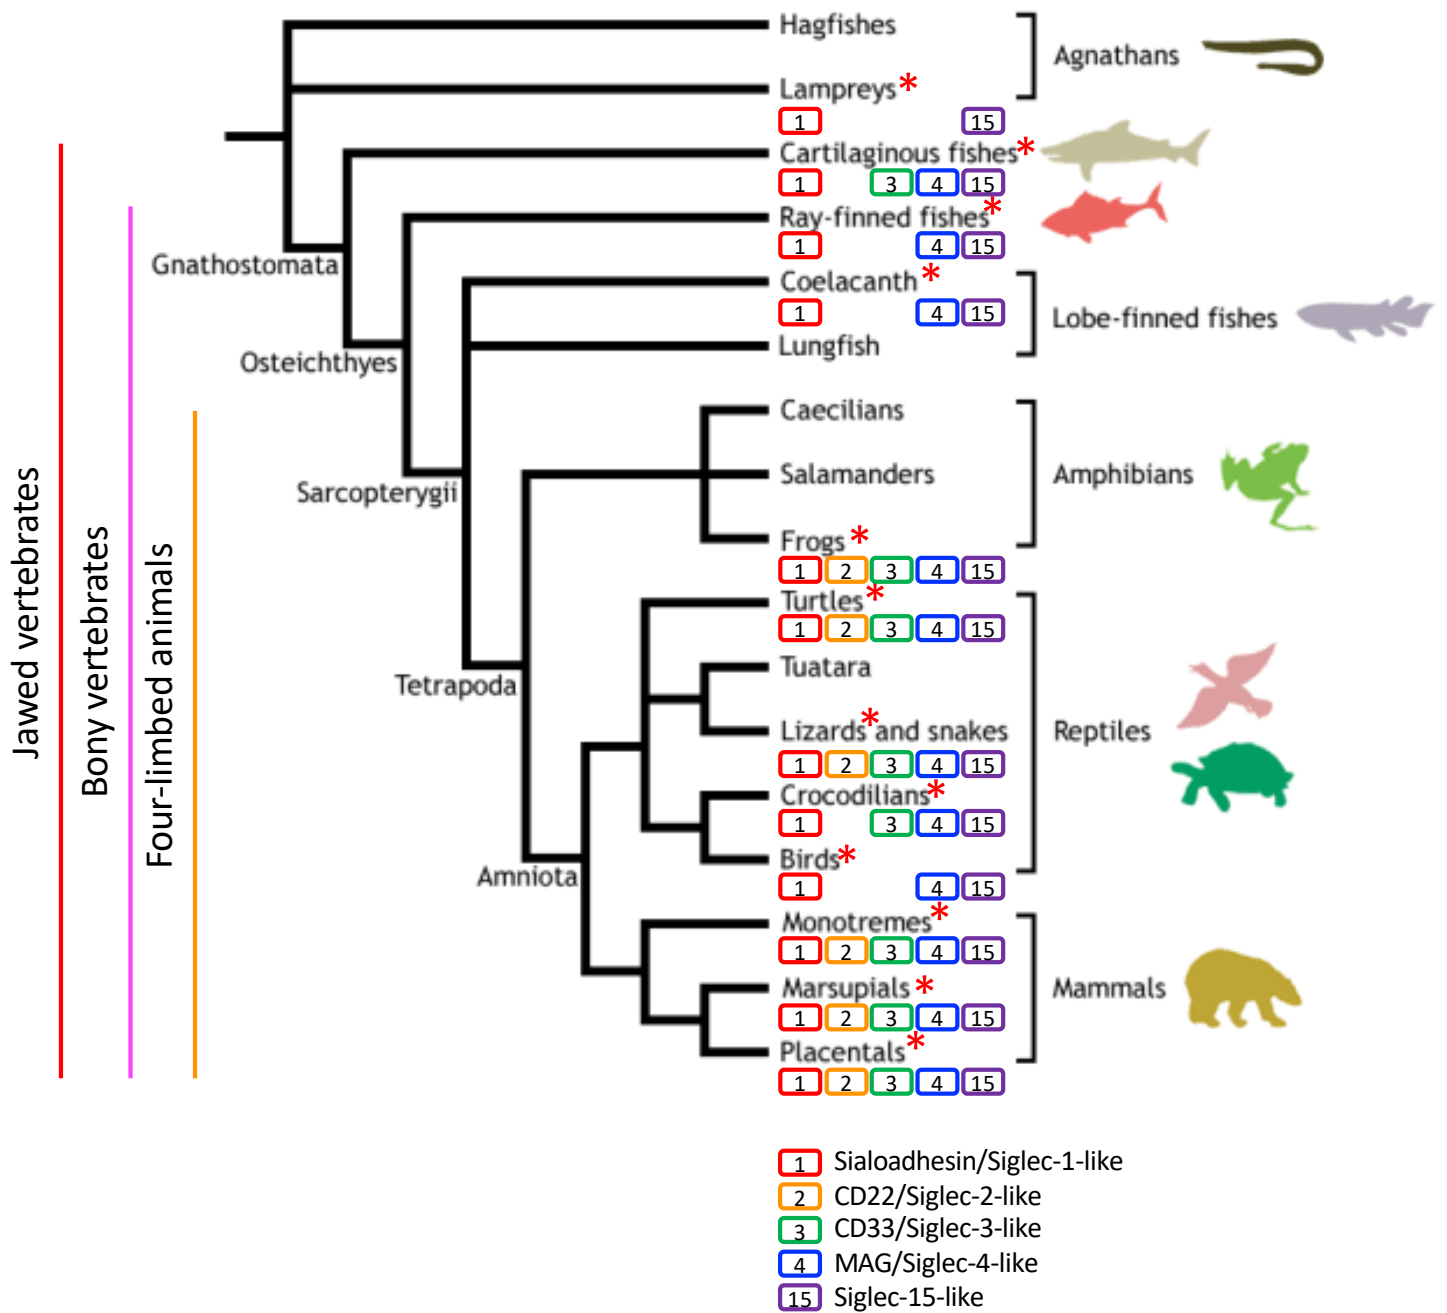

### Supplementary Figure 2. Tree of vertebrate life and presence of Siglecs.

The phylogenetic tree of vertebrates is based on Meyer and Zardoya (2003) *Annu. Rev. Ecol. Evol. Syst.* 34:311–338, and was downloaded from University College London website (<https://www.ucl.ac.uk/museums-static/obl4he/vertebratediversity/index.html>).

One or more of the species belonging to the clade indicated with red asterisk (\*) were subjected to genomic DNA sequence survey for Siglec V-set (Ig1) domain-like sequence and mentioned in the main text.

Licensed under the Creative Commons Attribution Non-commercial Share Alike 3.0 License (CC BY-NC-SA 3.0).

A

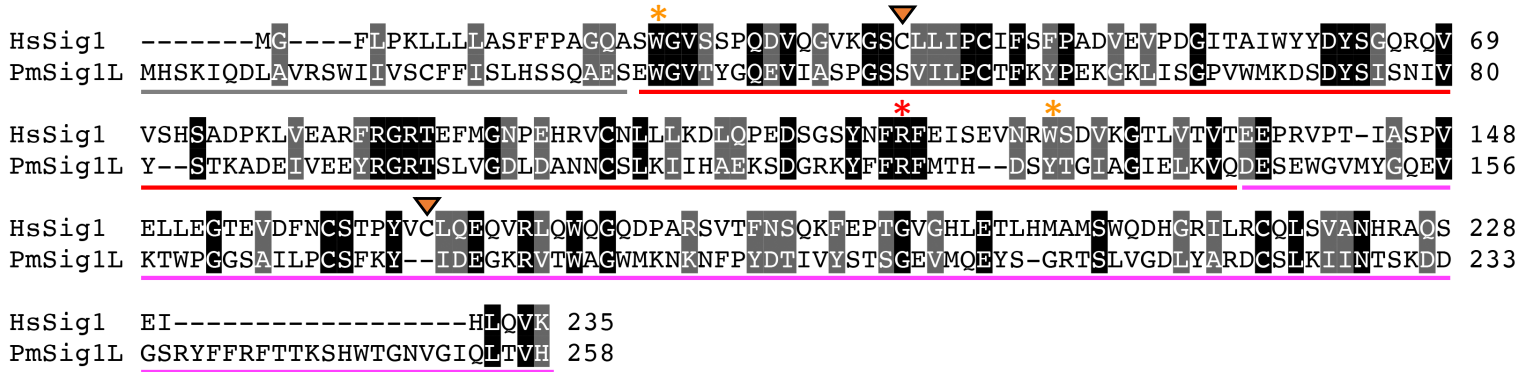

B

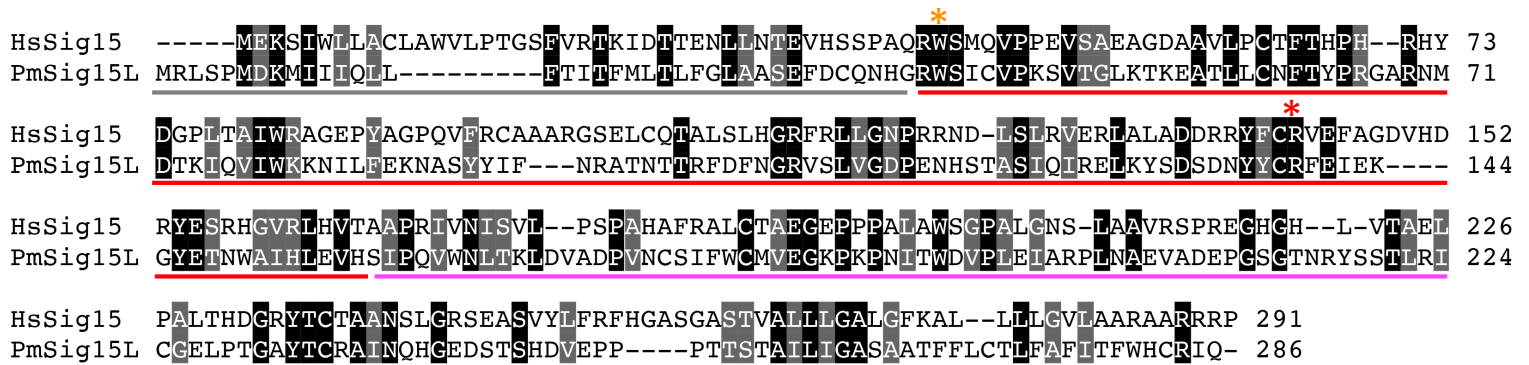

- Signal peptide
- Ig1
- Ig2
- \* Essential Arg
- \* Aromatic amino acid interacting with Sia
- ▼ Cys involved in inter-domain disulfide bond

**Supplementary Figure 3. Alignment of putative lamprey Siglecs with human homologs.**

Amino acid sequences of the N-terminal part (signal peptide – Ig1 – Ig2) of (A) human Siglec-1 (HsSig1) and lamprey homolog (PmSig1L), and (B) human Siglec-15 (HsSig15) and lamprey homolog (PmSig15L) were aligned with ClustalO, and conserved residues are highlighted.

Black shade: same amino acid; Gray shade: similar amino acids. GenBank accession number for Lamprey Siglec-1-like sequence: XM\_032693083; Siglec-15-like sequence: XM\_032963052.

```

HsSiglec15 ----MEKSIWLLACLAWLPTGSFVRTKIDTTENLLNTEVHSSPAQRWSSMQVPPPEVSAEAGDAAVLPCTFTHPHRHYDGP 76
HsHAVCR2  MFSHLPFDCVLL---LLLLLL-----TRSEVEYRAEVGQNAYLPCFYTPAAPGNLVP 50
HsHAVCR1  -MHPQVVIIISLII---HLAD-----SVAGSVKVGGEAGPSVTLPCHYSG----AVTS 44
HsTIMD4   -MSKEPLILWLMIEFWWLYLT-----PVTSETVVTEVLGHRVTLPLCLYSSWS-HSNS 51

HsSiglec15 LTAIWRAGEPYAGPQVFRCAAARG-SELQOTALSLHGREFRLLGNPRRNDLSLRVERLALADDRRYFCRVEFAGDVHDRYE 155
HsHAVCR2  --VCWKGKA---CPVFECGNVVLRTDERDVNYWT-SRYWLNQDFRKGDVSLTIENVTLADSGIYCCRIQIIPGIMNDEK- 122
HsHAVCR1  --MCWNRGS---CSLFTCONGIWVINGTHVYRKDTRYKLLCDLSRRDVSLTIENTAVSDSGVYCCRVEHRCWFNDMK- 117
HsTIMD4   --MCWKGKQ---CPYSGCKEALIRTDGMRVTSRKSAKYRLQCTIPRGDVSLTIENPSESDSGVYCCRIEVPWFNDVK- 124

HsSiglec15 SRHGVRHVT- 165
HsHAVCR2  --FNLKLVIKP 131
HsHAVCR1  --ITVSLIIVP 126
HsTIMD4   --INVRLNLQR 133

```

#### Supplementary Figure 4. Alignment of human Siglec-15 and related IgSF proteins.

Amino acid sequences of the signal peptide – Ig1 of human Siglec-15, TIM-1 (*HAVCR1*), TIM-3 (*HAVCR2*), TIM-4 (*TIMD4*) were aligned with ClustalO, and conserved residues (>70% consensus) are highlighted.

Black shade: same amino acid; Gray shade: similar amino acids.
